# Supplementary material for: Distinct chemotactic behavior in the original Escherichia coli K-12 depending on forward-and-backward swimming, not on run-tumble movements
Source: PubMed Central journal article supplement (PMC7522084; doi:10.1038/s41598-020-72429-1), 2020-09-28
Supplement: 41598_2020_72429_MOESM1_ESM.pdf [file 41598_2020_72429_MOESM1_ESM.pdf]

1 Distinct chemotactic behavior in the original  
2 *Escherichia coli* K-12 depending on forward-  
3 and-backward swimming, not on run-tumble  
4 movements

5 Yoshiaki Kinoshita<sup>1,2, ¶,\*</sup>, Tsubasa Ishida<sup>3</sup>, Myu Yoshida<sup>3</sup>, Rie Ito<sup>3</sup>,  
6 Yusuke V. Morimoto<sup>4</sup>, Kazuki Goto<sup>1</sup>, Richard M. Berry<sup>2</sup>, Takayuki  
7 Nishizaka<sup>1</sup> & Yoshiyuki Sowa<sup>3,\*</sup>

8 <sup>1</sup>Department of Physics, Gakushuin University, 1-5-1 Mejiro, Toshima-ku, Tokyo 171-  
9 8588, Japan.

10 <sup>2</sup>Department of Physics, University of Oxford, Park road OX1 3PU, Oxford, UK

11 <sup>3</sup>Department of Frontier Bioscience and Research Center for Micro-Nano Technology,  
12 Hosei University, Tokyo 184-8584, Japan

13 <sup>4</sup>Department of Physics and Information Technology, Faculty of Computer Science and  
14 Systems Engineering, Kyushu Institute of Technology, Iizuka, Fukuoka, Japan

15 <sup>¶</sup>Present address: Molecular Physiology Laboratory, RIKEN, Japan

16 \*Correspondence should be addressed to [yoshiaki.kinoshita@gmail.com](mailto:yoshiaki.kinoshita@gmail.com) or  
17 [ysowa@hosei.ac.jp](mailto:ysowa@hosei.ac.jp)

18 This file includes:  
19 Supplementary Figures 1-10  
20 Supplementary Table 1-3  
21 Captions for Supplementary Videos  
22 Supplementary References  
23

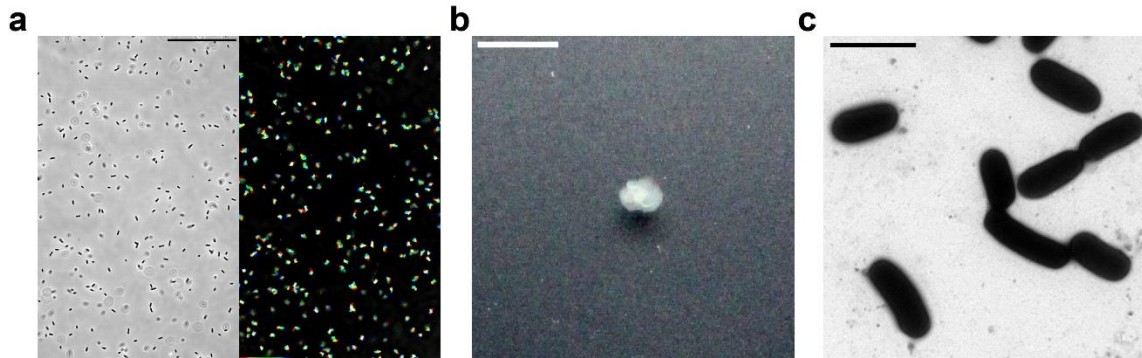

24

25 **Supplementary Figure 1 Characterization of swimming motility and**  
26 **structural parameters of SHU101**

27 (a) *Left:* Phase-contrast image of the non-flagellated mutant, SHU101. Scale bar, 50  $\mu\text{m}$ .

28 *Right:* The sequential phase-contrast images with 165-ms intervals were integrated for 5  
29 s with the intermittent color code 'red,  $\rightarrow$  yellow,  $\rightarrow$  green,  $\rightarrow$  cyan,  $\rightarrow$  blue.' The  
30 processive linear movements could not be seen, indicating that the SHU101 is a non-

31 motile strain. (b) Motility of SHU101 cells on a 0.25 % (wt/vol) soft-agar plate at 30°C  
32 for 7 h. Scale bar, 0.5 cm. (c) Electron micrograph. Scale bar, 2  $\mu\text{m}$ .

33

34

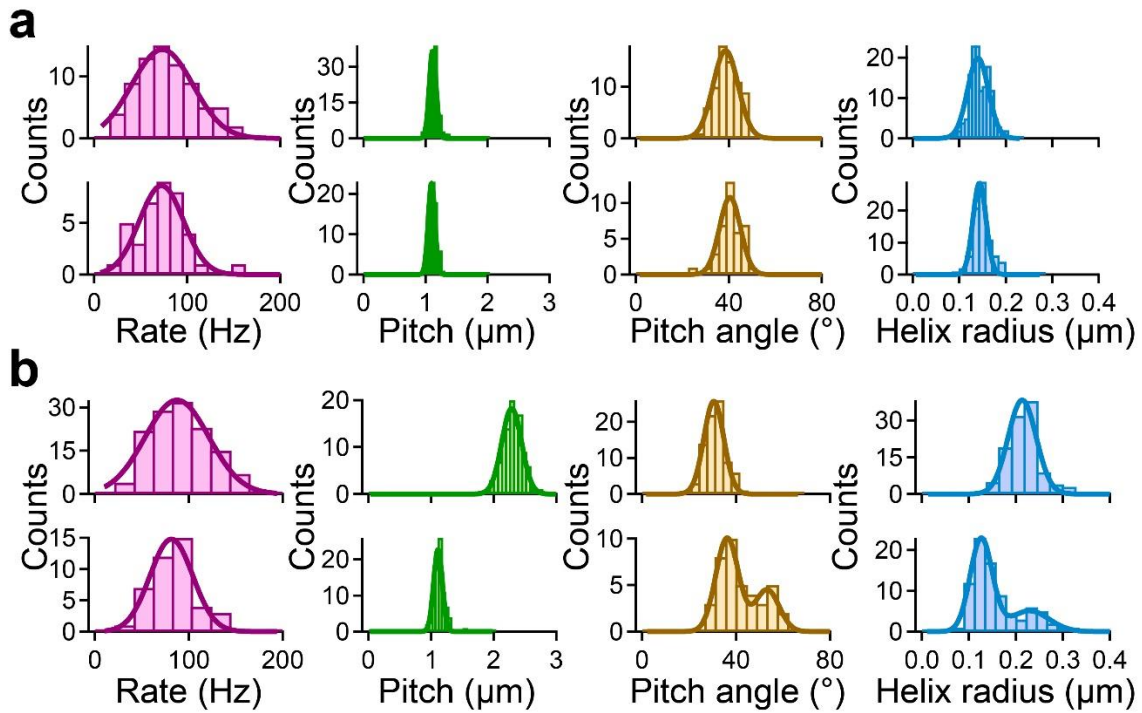

35

36 **Supplementary Figure 2 Quantification of rotational rate and structural**  
 37 **parameters of flagella under total internal reflection fluorescence**  
 38 **microscope (TIRFM)**

39 (a) Histograms of the rotation rate and structural parameters during CCW (*top*) and CW  
 40 rotation (*bottom*) in ATCC10798 cells. Solid line represents the Gaussian fitting. The  
 41 peaks and SDs of rotational rates were  $73.3 \pm 32.8$  Hz in CCW direction ( $n = 74$ ) and  
 42  $72.4 \pm 23.7$  Hz in CW direction ( $n = 39$ ). The flagellar pitches were  $1.1 \pm 0.1$   $\mu\text{m}$  in CCW  
 43 ( $n = 142$ ) and  $1.1 \pm 0.1$   $\mu\text{m}$  in CW direction ( $n = 80$ ). The pitch angles were  $38.6 \pm 5.4$   
 44 degree in CCW ( $n = 70$ ) and  $40.5 \pm 4.5$  degree in CW ( $n = 39$ ). The helix radii were  $0.14$   
 45  $\pm 0.02$   $\mu\text{m}$  in CCW ( $n = 142$ ) and  $0.14 \pm 0.01$   $\mu\text{m}$  in CW ( $n = 80$ ). (b) Histograms of the  
 46 structure and rotation rate of flagella of W3110 during left-handed (*top*) and right-handed  
 47 (*bottom*) state. The rotation rates were  $87.6 \pm 34.0$  Hz under a left-handed state ( $n = 133$ )  
 48 and  $81.5 \pm 22.7$  Hz under a right-handed state ( $n = 42$ ). The flagellar pitches were  $2.3 \pm$   
 49  $0.2$   $\mu\text{m}$  under a left-handed state ( $n = 112$ ) and  $1.1 \pm 0.1$   $\mu\text{m}$  under a right-handed state ( $n$   
 50  $= 84$ ). The pitch angles were  $30.5 \pm 4.2$  degree under a left-handed state ( $n = 81$ );  $36.2 \pm$   
 51  $4.8$  and  $53.2 \pm 5.1$  degree under a right-handed state ( $n = 40$ ). The helix radii were  $0.21 \pm$   
 52  $0.03$   $\mu\text{m}$  under a left-handed state ( $n = 112$ );  $0.13 \pm 0.02$   $\mu\text{m}$  and  $0.23 \pm 0.04$   $\mu\text{m}$  under a  
 53 right-handed state ( $n = 84$ ).

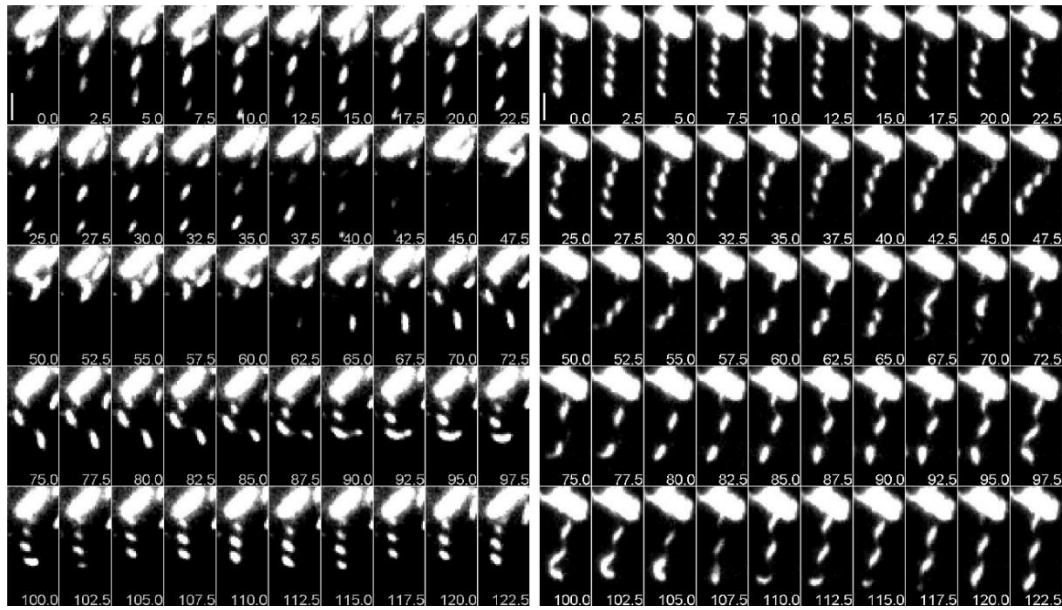

54

55 **Supplementary Figure 3 Real-time imaging of flagellar polymorphism in**  
 56 **W3110**

57 Sequential images of the flagellar polymorphism at 2.5-ms intervals. *Left*: The orientation  
 58 of flagellar filament(s) was from the first quadrant to the third quadrant relative to the  
 59 major axis of the filament, indicating that the helicity of filaments was left-handed. From  
 60 0 to 22.5 ms, the wave of flagella propagated in a direction away from the hook end  
 61 toward the flagellar tip, indicating that the flagella rotated in CCW direction. The  
 62 direction of rotation was switched at 30.0 ms, and then their helicity changed from the  
 63 left-handed into right-handed within 50 ms. Taken together that the pitch angle of  
 64 flagellar filaments was 58 degrees, the filament form was the semi-coiled. Scale bar, 2  
 65  $\mu\text{m}$ . *Right*: The orientation of flagellar filament (s) was from the second quadrant to the  
 66 fourth quadrant relative to the major axis of the filament, indicating that the helicity of  
 67 filaments was right-handed. We concluded that the flagellar form was the curly state with  
 68 the fact of the  $40^\circ$ -pitch angle. From 0 to 17.5 ms, the flagellar filament did not move. At  
 69 20 ms, the flagellar filaments gradually moved, suggesting that the flagella started to  
 70 rotate. The flagellar filaments dynamically twisted at 40 ms, and then the right-handed  
 71 and left-handed flagellar were combined into a single filament at 67.5 and 105.0 ms,  
 72 which was also seen in another bacterium. Finally, the curly filament(s) transformed into  
 73 the normal state within 100 ms. Scale bar, 2  $\mu\text{m}$ . Data from Supplementary Videos 6 and  
 74 7.

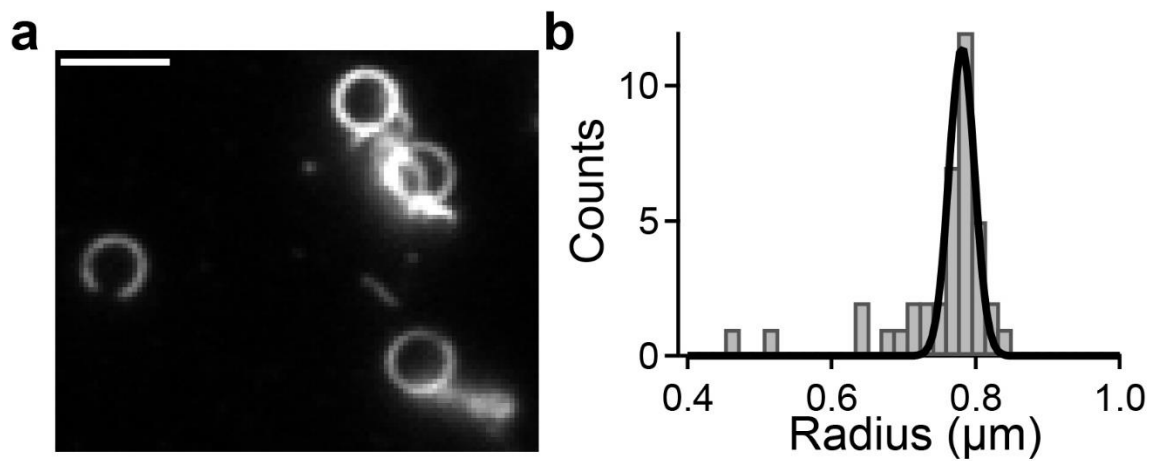

75

76 **Supplementary Figure 4 Quantification of flagellar radius at coiled state in**  
77 **W3110**

78 (a) The fluorescent micrograph of coiled-state flagellar filaments. Scale bar; 3 μm. (b)

79 Histogram of the radius of coiled flagella. The solid line represents the Gaussian fitting,

80 where the peak and SD are  $0.78 \pm 0.02 \mu\text{m}$  ( $n = 39$ ).

81

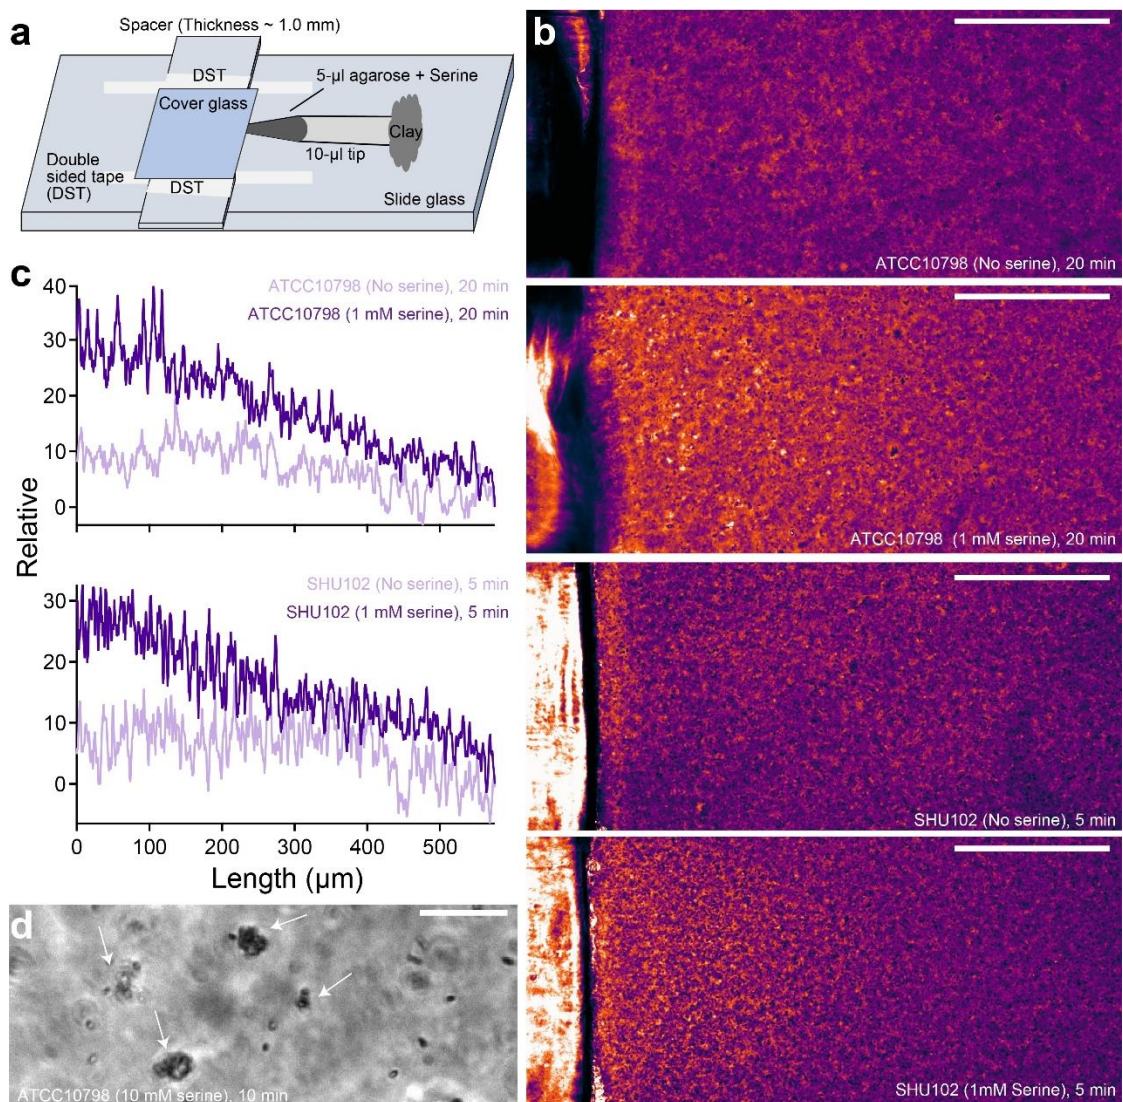

82

83 **Supplementary Figure 5 Chemotactic response of ATCC10798 [*fliC*(N87K)]**  
 84 **and SHU102 [*fliC*(N87K)::*fliC*] cells**

85 (a) The schematic of the tip (capillary) assay. The tip contains a 5- $\mu$ l buffer containing  
 86 1 % (wt/vol) agarose, and the other end was sealed with clay to avoid an effect of oxygen  
 87 on a chemotactic response. (b) Pseudo-colors of phase-contrast images of ATCC10798  
 88 (top) and SHU102 cells (bottom). In the presence of 1 mM serine, both *E.coli* strains  
 89 exhibit a chemotactic response and gather near a tip (orange color). Scale bar, 200  $\mu$ m.  
 90 (c) Intensity profiles of b. (d) A phase-contrast image of ATCC10798 cells in the presence  
 91 of 10 mM serine. In the presence of serine, ATCC10798 cells tend to gather and aggregate  
 92 each other, which was not detected in SHU102 cells. Scale bar, 20  $\mu$ m.

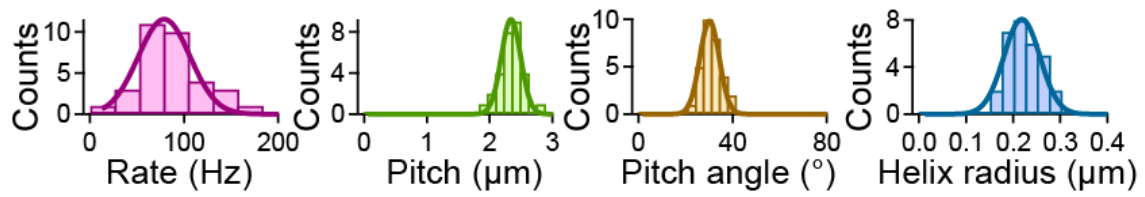

93

94 **Supplementary Figure 6 Quantification of rotational rate and structural**  
 95 **parameters of flagella of SHU102 under TIRFM**

96 Histograms of the structure and rotation rate of flagella of SHU102. The solid line  
 97 represents the Gaussian fitting. Peaks and SDs of the rotation rate were  $78.9 \pm 27.5$  Hz (n  
 98 = 33). The flagellar pitch was  $2.3 \pm 0.2$   $\mu\text{m}$  (n = 30). The pitch angles were  $30.2 \pm 4.1$   
 99 degrees (n = 30). The helix radius was  $0.22 \pm 0.04$   $\mu\text{m}$  (n = 30).

100

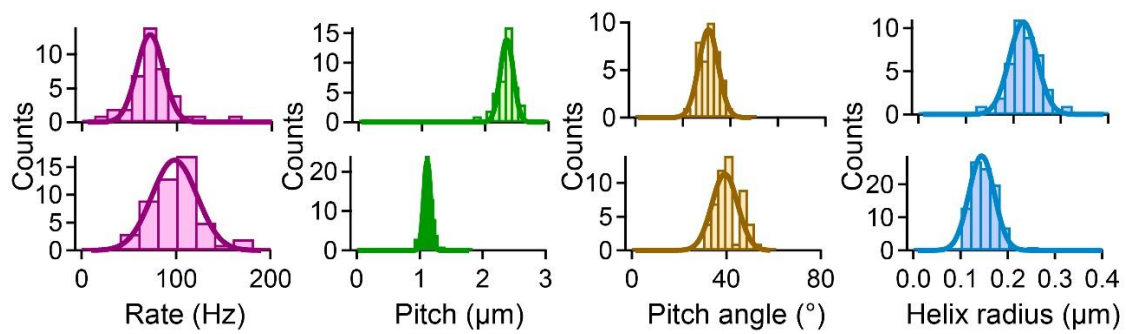

101

102 **Supplementary Figure 7 Quantification of rotational rate and structural**  
 103 **parameters of HCB1336/pYS10 and HCB1336/pSHU61 under TIRFM**

104 Histograms of the structural properties and rotation rate of flagella of *E. coli* HCB1336  
 105 ( $\Delta fliC$  strain) carrying the plasmid encoding wild-type *fliC* (pYS10) and *fliC*(N87K)  
 106 (pSHU61). Solid line represents the Gaussian fitting. Peaks and SDs of the rotation rate  
 107 were  $71.8 \pm 14.1$  Hz in HCB1336/pYS10 (*top*,  $n = 41$ ) and  $98.4 \pm 23.9$  Hz in  
 108 HCB1336/pSHU61 cells (*bottom*,  $n = 50$ ) and. The flagellar pitches were  $2.3 \pm 0.1 \mu\text{m}$  in  
 109 HCB1336/pYS10 cells (*top*,  $n = 40$ ) and  $1.1 \pm 0.1 \mu\text{m}$  in HCB1336/pSHU61 cells (*bottom*,  
 110  $n = 94$ ). The pitch angles were  $30.8 \pm 4.1$  degree in HCB1336/pYS10 cells (*top*,  $n = 37$ )  
 111 and  $39.3 \pm 5.5$  degree in pSHU61/HCB1336 cells (*bottom*,  $n = 52$ ). The helix radii were  
 112  $0.22 \pm 0.03 \mu\text{m}$  in HCB1336/pYS10 cells (*top*,  $n = 40$ ) and  $0.14 \pm 0.03 \mu\text{m}$  in  
 113 HCB133/pSHU61 cells (*bottom*,  $n = 94$ ).



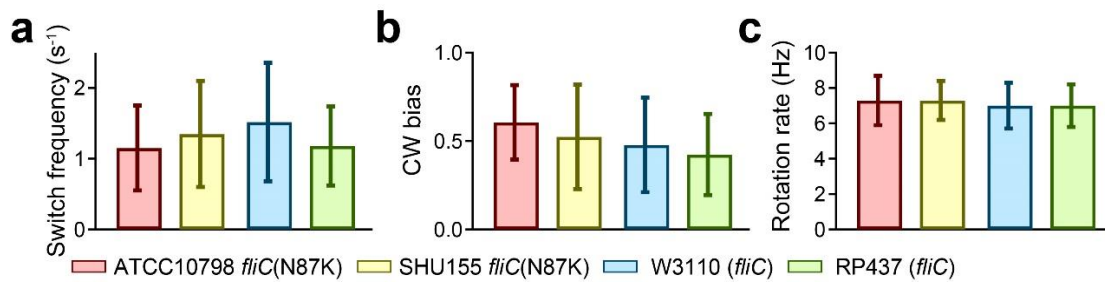

114

115 **Supplementary Figure 8 Quantification of motor properties by tethered-cell**  
 116 **assay**

117 (a) Switching frequency between *E. coli* strains for 10 sec. The average and SD were 1.15  
 118 ± 0.60 s<sup>-1</sup> in ATCC10798 (n = 99), 1.35 ± 0.75 s<sup>-1</sup> in SHU155 (n = 67), 1.52 ± 0.84 s<sup>-1</sup> in  
 119 W3110 (n = 53), and 1.18 ± 0.56 s<sup>-1</sup> in RP437 (n = 49). (b) CW bias (Time<sub>cw</sub>/Time<sub>Total</sub>).  
 120 The average and SD were 0.61 ± 0.21 in ATCC10798 (n = 99) and 0.52 ± 0.30 in SHU155  
 121 (n = 67), 0.48 ± 0.27 in W3110 (n = 53), and 0.42 ± 0.23 in RP437 (n = 49). (c) Rotation  
 122 rates. The average and SD were 7.3 ± 1.4 Hz in ATCC10798 (n = 99), 7.3 ± 1.1 Hz in  
 123 SHU155 (n = 67), 7.0 ± 1.3 Hz in W3110 (n = 53), and 7.0 ± 1.2 Hz in RP437 (n = 49).  
 124 ATCC10798 and W3110 data from Figure 3.

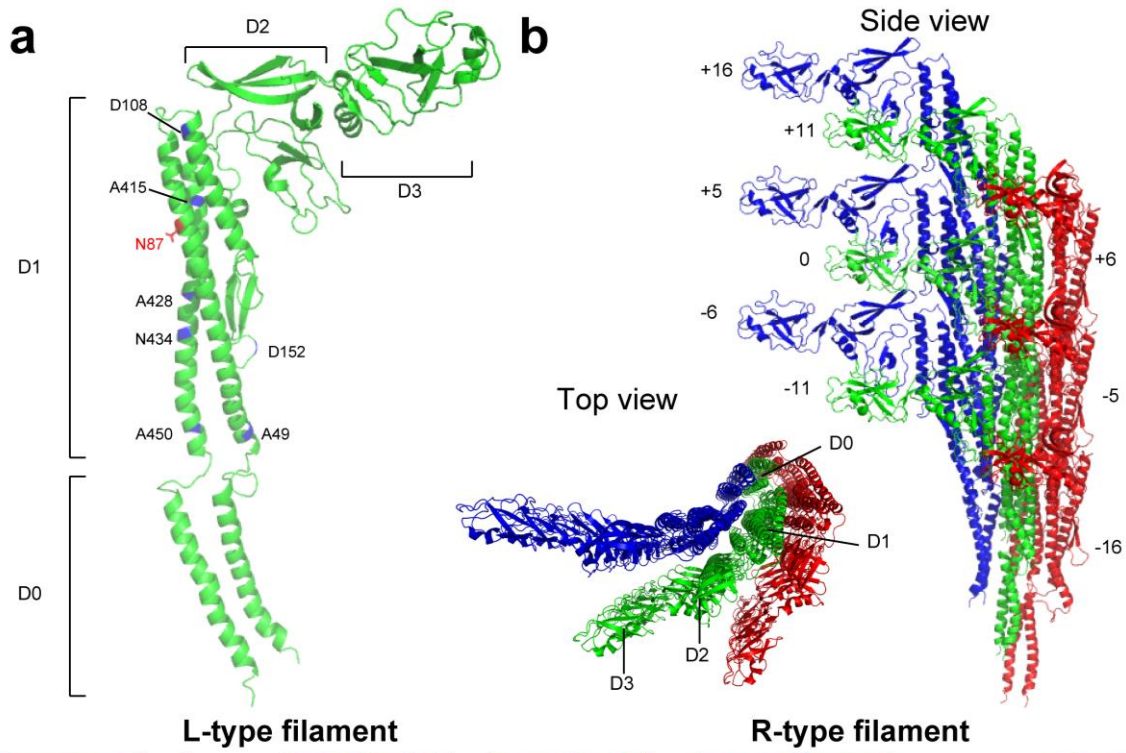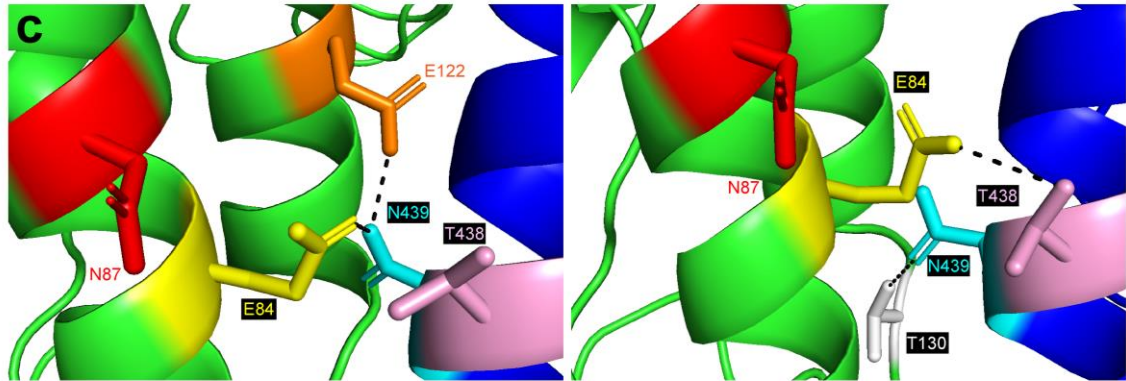

**d**

*Vibrio alginolyticus* ATCC17749  
*Pseudomonas aeruginosa* PAO1  
*Escherichia coli* K-12 W3110  
*Salmonella typhimurium* LT2  
*Bacillus subtilis* 168  
*Rhodobacter sphaeroides* ATCC 17029  
*Helicobacter pylori* 26695  
*Caulobacter crescentus* CB15

```

1  --MAINVNTNVSAMTAQRYLNQAADGQQKSMERLSSGYKINSKADDAAGLQISNRLNAQSRGLDMAVKFNANDGISIAQVAGEMNESTNLLQRMRDLSLQS
1  -MALTVNTNIASINTQRNLNASSNDLNTSLQRITTYGYRINSKADDAAGLQISNRLNQISGLNVATRNANDGISLAQTAEGALQQSTNLLQIRIDRALQS
1  -MAQVINTNSLSLITQNNLNKNSQALSSIERLSSGLRINSKADDAAGQAIAANRFTSNIKGLTQAARNANDGISVAQTTEGALNEINNLQVRVELTVA
1  -MAQVINTNSLSLITQNNLNKNSQALSSIERLSSGLRINSKADDAAGQAIAANRFTSNIKGLTQAARNANDGISIAQITTEGALNEINNLQVRVELTVA
1  --MTRHNIAALNLTNLRSSNNSASQKMEKLSGLRINSRAGDAAAGLAISEKMRGQIRGLEMAKSNQDGSISLQVTEGALTEHAIQVRVELVQA
1  --MTTINTNIGIAAQANMTKVNQDFNTAMTRLSGLRINAADDAAGMAIEMKTAQVMGLNQAIRNAQDGNLVDTEGAHVEVSSMLQRLRELVAQ
1  -MSFRINTNIAALTSHAVVQNNRDLSSLEKLSGLRINKAADDSSGMAIADSLRSQSANLQAIRNANDAIMVQVADKAMDEQIKLITLTKTKAVQA
1  MALNSINTNSGALIALQNLNLTNAELTQVQQRINTGKIKSAGKONGAIWATAKNQSATAGSMNAVKDSLQRGQSTIDVALAAGDTITDGLKMKKEKALAA

```

**★ ★**

*Vibrio alginolyticus* ATCC17749  
*Pseudomonas aeruginosa* PAO1  
*Escherichia coli* K-12 W3110  
*Salmonella typhimurium* LT2  
*Bacillus subtilis* 168  
*Rhodobacter sphaeroides* ATCC 17029  
*Helicobacter pylori* 26695  
*Caulobacter crescentus* CB15

```

100 ANG--SNSKAERVAIQEEVTAINDLNRIAETTSFGGKLLNG-----TYGTQSFQIGADSGEAVMLSMG-----
100 ANG--SNSADRAALQKRWAAQQAELRISDITTFGGRKLLDG-----SFTTSPQVGSNAVETIDISLQNSAIAIGS
100 TTG--TNSQDLSSIQDEIKSRLEIDRVSQGTQFNQVNVLAQKNSMKIQVANDNQITIDLKQIDAKLGLDGFVKNNDIVTSAAPVAFGATTTN
100 ANS--TNSQDLDSIQAEITQRNLNIDRVSQGTQFNQVNVLAQKNSMKIQVANDNQITIDLKQIDAKLGLDGFVKNNDIVTSAAPVAFGATTTN
98  GNTGQDKATDLQSIQDEISALTRDIDIGISNRTFENGKLLDG-----TYKVDVTFPAMQKNLVFQIGANATQQ
99  SND--TNTAADRGLAEPKQLIARINRVAESTTFNPKVLDG-----SFTGKQLQIGADSGQMAINVDSSAAADTIGA
100 AQD--GQLESRRALQSDIQRLLELONIAANTTSFNGQMLSG-----SFSNKEFQIGAVSNATVKAISGTSDDKIGH
101  SDT--SLMTASFNALKDFDLSLRDQITKAASNAKFNQVSIADG-----

```

**★ ★**

*Vibrio alginolyticus* ATCC17749  
*Pseudomonas aeruginosa* PAO1  
*Escherichia coli* K-12 W3110  
*Salmonella typhimurium* LT2  
*Bacillus subtilis* 168  
*Rhodobacter sphaeroides* ATCC 17029  
*Helicobacter pylori* 26695  
*Caulobacter crescentus* CB15

```

163 -----NLRSDTSAMGKGSYAAEEGKDAASWTVGEKTEFK
172 YQVGSNGAGTVASVAGTATASGASGTVNLVGGGQ-----VKNIALAAGDSAKAIAEKMDGAIPLNSARARTVFDATAGVAVKQVGSQGFKAARNVVAAGT
198 IKLTGTLTSTAATDGTGTFNPAIEGYVTDGNDY-----YAKITGGDNDGKYAVTVAN-DGVTMTAGTANAT--VDANATKATITSGGTPVQI
198 LNSITFKASATGLGGDQKIDGLKFDFTTKGYIA-----LVTVTGGTQKDGKYEVSVDRKNGEVTLLAGGATSLPTLGGPATAEVDNQQVAVNADTIE
167 ISVNIEDMGADALG-----FDAQ-----IKEADGSAIALHSVNDLVDTK
171 HKISSASTVVAADALDTTIAASTDITIGFAGSD-----KITTAAGDSARTLAESINKKTSSTGVEATATKAQLSGFTKGDVFSFKIGTADGNEVSI
172 VRMETSFSFGAMLSAAAQNLTEVGLNFKQVNGVNDYKIEVTRISATSAGTIGALSEIINRFSNITLGRASYNWMAVGGTQVQSGVRELITNGVEIGT
142 -----TTTLKLSFLANDSGSAFVTAKTLLGLLGLTGA

```

**★**

*Vibrio alginolyticus* ATCC17749  
*Pseudomonas aeruginosa* PAO1  
*Escherichia coli* K-12 W3110  
*Salmonella typhimurium* LT2  
*Bacillus subtilis* 168  
*Rhodobacter sphaeroides* ATCC 17029  
*Helicobacter pylori* 26695  
*Caulobacter crescentus* CB15

```

196 MSYTNKQGEKE-----LSISAKQG-----DDIEQLATYINGQNDVVKASVGEDGKLVQ
266 AGVSTIQDLADQ-----LNSNSKLGITASINDKGVLTITSAT-----GENVKGAGTGTATAGQAVKQVGSQGFKAARNVVAAGT
289 DNTGASATANLG-----AVSLVKLQDSKGN-----DPTYALKRDTNGLNLAADVNTTGAVSRTTITYDSSGAA
292 AKAAALTAAGVTG-----TASVVKMSYTDNNG-----KTIDGGLAVKVGDDYYSATKNDGTSISINTFKYITNVAAGT
202 FADNAADTADIG-----FDAQ-----LKVVDVAENQVSSQRAKLGAVQNRLEHTINNSASGENLTAEE
218 GDVSIIDASDVRGLRDAINAVSQTGITAAAMAKDNKSIVLTD-----ANGDDIMLTVSSSTADFKVTKALKSDGTAFTANVDIGFTN
272 VNDVHKNDADGRLTN-AINSVKDRTGVEASLDIQGRINLHSDIGRAISVHAASAGQVFGGNGFAGISGTQHAVIGRLTLTRTDARDIIVSGVNFHVGF
174 TSSFTTAAAKT-----

```

**★**

*Vibrio alginolyticus* ATCC17749  
*Pseudomonas aeruginosa* PAO1  
*Escherichia coli* K-12 W3110  
*Salmonella typhimurium* LT2  
*Bacillus subtilis* 168  
*Rhodobacter sphaeroides* ATCC 17029  
*Helicobacter pylori* 26695  
*Caulobacter crescentus* CB15

```

245 PASSQKVEGDVEFSGNLADEIG-----FGGPKDVTVKDIDVTTVAGSQEAVAVIDGALKSVDSQASLGAQNRNFHAISSLNINENVNASK
345 AATTTIVTGYQLNSPTAYSVSGTGTQASQVFNASAAQKSSVASVDISTADGAQNAIAVVDNALAAIDAQADLGAQVNRFKNTIDNLTNISENATNAR
354 SSPTALVGGDDGRTEVVDIDGKTYDSADLGNLQTLTAGEALLAVANGKTTDPLKALDDAIASVDFRSSLGAQVNRNLSAVNLTNLTNLSAQ
358 KT-ALNKLGGADGRTEVVISGGKTYAASKAEHGNFKAQPLDAEAAATTTEN-----PLQKIDALAQVDTLRSDLGAQVNRNLSAVNLTNLTNLSAQ
219 -----LKVVDVAENQVSSQRAKLGAVQNRLEHTINNSASGENLTAEE
218 KSAGVTGQVLDVSTKFSVAASVSGSATAPHANANGSELSSVAEIDLSTAEASAAIGVIDVALSKISQSRSELGAVSNRLDSTISNLTNISTSVQAAK
371 HSAQGVAEYTVNLRVAVRGIFFDANVASAAGANANGAQETNSQIGAGVTSLKGAMI VMDMADSARTQLDKIRDSMGSVQMLVTTINNSIVTVQVKAAY
186 -----MIGTIDTALQTATNKLASLSTSGLDLTHLTVGKQLQDSLDAV

```

*Vibrio alginolyticus* ATCC17749  
*Pseudomonas aeruginosa* PAO1  
*Escherichia coli* K-12 W3110  
*Salmonella typhimurium* LT2  
*Bacillus subtilis* 168  
*Rhodobacter sphaeroides* ATCC 17029  
*Helicobacter pylori* 26695  
*Caulobacter crescentus* CB15

```

333 SRIKDTDYAKETTAMTKSQILQQASTSILAQAQKQSFSAALSLLG-
445 SRIKDTDFAAETAALSKNQVLLQAGTAIALAQANLQPAVLSLLR-
454 SRIQDADYATEVSNMSKAQIQQAGNSVLAKANQVQVQLSLLQG-
452 SRIEDSDYATEVSNMSRAQIQQAGTSVLAQANQVQNVLSLLR-
261 SRIKRDVMAKEMSEFTKNNILSQASQAMLAQANQVQNVQLLRL-
449 SQVMDADFAAESTNLARSQILSQASTAMLAQANSSKQNVLSLLR-
471 SQIRVDVFAEESANFSKYNILAQSGSFAMAQANVQNVLRLLQ-
230 GNLVDADLAKESAKLQSLQTKQLGVQALSIAQNSSSSILSLFR-

```

126 **Supplementary Figure 9 Structure and sequence of flagellin**

127 (a) Subunit structure of L-type flagellar subunit (PDB: 3A5X). The important residues  
128 for a curly filament are shown. (b) Side views of L-type flagellar filament. The number  
129 of protofilaments is shown. *Inset*: Top view of filaments. (c) L-type (*left*, PDB: 3A5X)  
130 and R-type (*right*, PDB: 1UCU) straight filaments of *S. typhimurium* are shown <sup>3,4</sup>.  
131 Hydrogen bonds interaction (black) between S0 (green) and S5 subunits (blue). E84, N87,  
132 E122, T130 of the S0 subunit are colored in yellow, red, orange, and white, respectively;  
133 T438 and N439 of the S5 subunit are colored in cyan and pink, respectively. (d)  
134 Alignments of the flagellin amino acid sequence from typical bacteria. The red star  
135 represents N87 residue; blue stars indicate E84, E122, T130, T438, N439 residues.  
136 Images were generated using PyMOL 2.4 (<https://pymol.org/2/>).

137

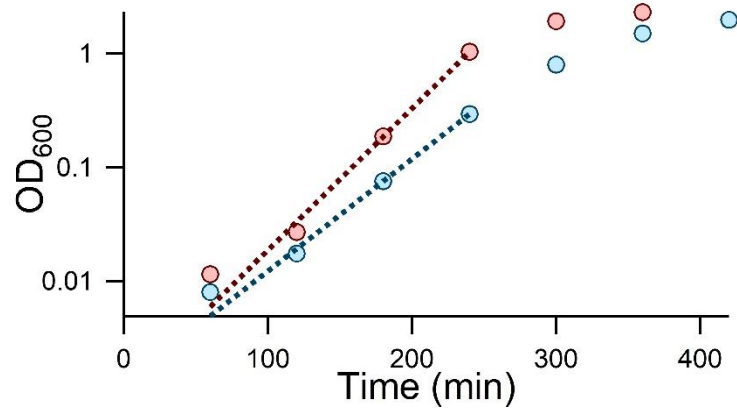

138

139 **Supplementary Figure 10 Growth curve in *Escherichia coli* K-12 ATCC10798**  
 140 **and W3110**

141 The single colony was scrutinized by the tip, resuspended into 50-ml LB medium, and  
 142 then cultured at 37°C with shaking. The absorbance of cells at 600 nm were periodically  
 143 measured with 60-min intervals. During the exponential phase, we fitted the data as the

144 following equation:  $f(t) = A \times 2^{\frac{t}{\tau}}$ , where  $A$  the constant and  $\tau$  the doubling time. The  
 145 doubling time was estimated to be ~24 min in ATCC10798 (red) and 30 min in W3110  
 146 (blue). The experiments were performed two times.

147

148

149 **Supplementary Table 1**

150 Structural parameters and kinematics of the cell body and flagella in *Escherichia coli*.  
 151 Values were directly measured by either a transmission electron microscopy (EM) or  
 152 optical microscopy (OM).

| Cells          | EM                               |                                 |                                       |                                                |                       |                                      | OM                                            |                          |
|----------------|----------------------------------|---------------------------------|---------------------------------------|------------------------------------------------|-----------------------|--------------------------------------|-----------------------------------------------|--------------------------|
|                | Body length<br>( $\mu\text{m}$ ) | Body width<br>( $\mu\text{m}$ ) | Flagellar length<br>( $\mu\text{m}$ ) | Flagellar<br>helix radius<br>( $\mu\text{m}$ ) | Flagellar<br>number   | Flagellar pitch<br>( $\mu\text{m}$ ) | Swimming<br>speed<br>( $\mu\text{m s}^{-1}$ ) | Rotation<br>rate<br>(Hz) |
| ATCC10798      | 1.9 $\pm$ 0.3<br>(62)            | 0.70 $\pm$ 0.07<br>(62)         | 4.7 $\pm$ 1.1<br>(62)                 | 0.14 $\pm$ 0.03<br>(59)                        | 1.8 $\pm$ 0.6<br>(61) | 1.3 $\pm$ 0.2<br>(59)                | 13.2 $\pm$ 4.4<br>(70)                        | 73.3 $\pm$ 32.8<br>(74)  |
| W3110          | 2.1 $\pm$ 0.5<br>(50)            | 0.77 $\pm$ 0.13<br>(50)         | 7.3 $\pm$ 1.9<br>(48)                 | 0.22 $\pm$ 0.05<br>(42)                        | 6.5 $\pm$ 2.3<br>(39) | 3.0 $\pm$ 0.2<br>(41)                | 32.5 $\pm$ 6.6<br>(50)                        | 87.6 $\pm$ 34.0<br>(133) |
| pYS10/HCB1336  | 2.1 $\pm$ 0.4<br>(57)            | 0.83 $\pm$ 0.17<br>(57)         | 5.8 $\pm$ 1.6<br>(57)                 | 0.22 $\pm$ 0.06<br>(44)                        | 3.2 $\pm$ 1.3<br>(57) | 2.7 $\pm$ 0.3<br>(42)                | 21.7 $\pm$ 4.5<br>(53)                        | 71.8 $\pm$ 14.1<br>(41)  |
| pSHU61/HCB1336 | 1.8 $\pm$ 0.2<br>(46)            | 0.73 $\pm$ 0.12<br>(46)         | 4.5 $\pm$ 0.9<br>(44)                 | 0.14 $\pm$ 0.03<br>(46)                        | 3.1 $\pm$ 1.3<br>(46) | 1.4 $\pm$ 0.1<br>(46)                | 12.0 $\pm$ 4.2<br>(53)                        | 98.4 $\pm$ 23.9<br>(50)  |
| SHU101         | 1.9 $\pm$ 0.3<br>(21)            | 0.74 $\pm$ 0.06<br>(21)         | n.d.                                  | n.d.                                           | 0<br>(21)             | n.d.                                 | n.d.                                          | n.d.                     |
| SHU102         | 2.1 $\pm$ 0.3<br>(32)            | 0.95 $\pm$ 0.20<br>(32)         | 6.9 $\pm$ 1.5<br>(29)                 | 0.20 $\pm$ 0.04<br>(27)                        | 5.3 $\pm$ 2.4<br>(31) | 2.5 $\pm$ 0.2<br>(27)                | 26.3 $\pm$ 6.0<br>(45)                        | 78.9 $\pm$ 27.5<br>(33)  |

153

154

**Supplementary Table 2. Strains and plasmids**

| Strain/plasmid  | Relevant Phenotype/ Genotype                     | Source of Reference |
|-----------------|--------------------------------------------------|---------------------|
| <i>Strains</i>  |                                                  |                     |
| W3110           | Wild type                                        |                     |
| ATCC10798       | Wild type ( <i>fliC</i> N87K)                    | This study          |
| RP437           | Wild type for chemotaxis                         | 5                   |
| HCB1336         | CM735 $\Delta$ <i>fliC</i>                       | H. C. Berg          |
| SHU101          | ATCC10798 <i>fliC</i> (N87K):: <i>tetRA</i>      | This study          |
| SHU102          | ATCC10798 <i>fliC</i> (N87K):: <i>fliC</i>       | This study          |
| SHU155          | W3110 <i>fliC</i> :: <i>fliC</i> (N87K)          | This study          |
| <i>Plasmids</i> |                                                  |                     |
| pKD46           | Red system                                       | 6                   |
| pYS10           | FliC expression plasmid; pBR322 derivative       | 7                   |
| pSHU61          | FliC(N87K) expression plasmid; pBR322 derivative | This study          |

**Supplementary Table 3. Primers**

| Name                  | 5' > 3'                                                           | Note                                                                                   |
|-----------------------|-------------------------------------------------------------------|----------------------------------------------------------------------------------------|
| FliC ATCC FW          | GGAAACCCAATACGTAATCA                                              | Forward primer for PCR and sequencing of <i>fliC</i> in ATCC10798                      |
| FliC ATCC Rev         | CAATTTGGCGTTGCCGTACGTCTC                                          | Reverse primer for PCR and sequencing of <i>fliC</i> in ATCC10798                      |
| 1217_fliC(N87K)-f(QC) | CTGTCCGAAATCAACAAGAACTTACAGCGT<br>GTG                             | Forward primer for mutagenesis on <i>fliC</i>                                          |
| 1218_fliC(N87K)-r(QC) | CACACGCTGTAAGTCTTGTGATTTCGGA<br>CAG                               | Reverse primer for mutagenesis on <i>fliC</i>                                          |
| 0196_fliC-tetRA-F     | CAATATAGGATAACGAATCATGGCACAAGT<br>CATTAATACCTTAAGACCCACTTTCACATTT | Forward primer for PCR of <i>tetRA</i> cassette                                        |
| 0197_fliC-tetRA-R     | ACCCTGCAGCAGAGACAGAACCTGCTGCG<br>GTACCTGGTTACTAAGCACTTGTCTCTG     | Reverse primer for PCR of <i>tetRA</i> cassette                                        |
| 1232_fliC-F           | CAATATAGGATAACGAATCATGGCACAAGT                                    | Forward primer for PCR of wild-type <i>fliC</i> cassette                               |
| 0199_fliC-R           | TTAACCTGCAGCAGAGACAGA                                             | Reverse primer for PCR of wild-type <i>fliC</i> cassette and sequencing of <i>fliC</i> |
| 0210_tetRA-785-R      | GGCAAGACTGGCATGATAAGGCC                                           | Reverse primer for Colony PCR                                                          |
| 0211_tetRA-1090-F     | GTGAAGTGGTTCGGTTGGTTAGGG                                          | Forward primer for Colony PCR                                                          |
| 0219_fliC-(-175)-F    | ATAGCGGGAATAAGGGGACAGA                                            | Forward primer for Colony PCR and sequencing of <i>fliC</i>                            |
| 0220_fliC- (+250)-R   | GGTGGCGGGGAAGCACGTTGC                                             | Reverse primer for Colony PCR and sequencing of <i>fliC</i>                            |
| 0198_fliC-F           | ATGGCACAAGTCATTAATACC                                             | Forward primer for sequencing of <i>fliC</i>                                           |

## 159 **Captions for Supplementary Videos**

160 Supplementary Video 1

161 Swimming motility of *E. coli* K-12 ATCC10798 (*left*) and *E. coli* K-12 W3110 (*right*)  
162 observed under a phase-contrast microscope. ATCC10798 cells show 180°-  
163 reversals against to original swimming direction with the cell body rolling, whereas  
164 W3110 cells swim with the run and tumble movements. Scale bar, 20 μm.

165 Supplementary Video 2

166 Swimming motility of ATCC10798 (*left*) and W3110 (*right*) under a conventional  
167 fluorescent microscope. Scale bar, 20 μm.

168 Supplementary Video 3

169 High-speed imaging of flagellar rotation of ATCC10798 (*left*) and W3110 (*right*)  
170 using an EMCCD camera under a fluorescent microscope. Scale bar, 5 μm.

171 Supplementary Video 4

172 Flagellar rotation of ATCC10798 under TIRFM. Scale bar, 4 μm.

173 Supplementary Video 5

174 Flagellar rotation of W3110 under TIRFM. Scale bar, 5 μm.

175 Supplementary Video 6

176 Real-time imaging of a polymorphic flagellar change under TIRFM. A rotational  
177 direction was changed at 0.11 sec; subsequently, a normal left-handed filament  
178 was transformed into the right-handed semi-coiled filament. Scale bar, 2 μm.

179 Supplementary Video 7

180 Real-time imaging of a polymorphic flagellar change under TIRFM. A rotational  
181 direction was changed at 0.17 sec; subsequently, a right-handed curly filament  
182 was transformed into the normal left-handed filament. Scale bar, 2 μm.

183 Supplementary Video 8

184 Swimming motility of SHU102 (*left*), HCB1336/pYS10 (*middle*), and  
185 HCB1336/pSHU61 cells (*right*) under a phase-contrast microscope. Scale bar,  
186 50 μm.

187

188 Supplementary Video 9  
189 Swimming motility of SHU102 cells under a conventional fluorescent microscope.  
190 Scale bar, 20  $\mu\text{m}$ .

191 Supplementary Video 10  
192 Chemotactic response of ATCC10798 (*top*) and SHU102 cells (*bottom*) under a  
193 phase-contrast microscope. For the first 10 sec, cells swim in the absence of  
194 serine. For the last 10 sec, both cells swim in the presence of 1 mM serine. Scale  
195 bar, 200  $\mu\text{m}$ .

196 Supplementary Video 11  
197 Flagellar rotation of SHU102 (*left*), HCB1336/pYS10 (*middle*), and  
198 HCB1336/pSHU61 cells (*right*) under TIRFM. Scale bar, 2  $\mu\text{m}$ .

199 Supplementary Video 12  
200 Swimming motility of ATCC10798 (*left*) and W3110 (*right*) on a 0.2 % agarose  
201 pad. ATCC10798 cells cannot migrate after stuck, whereas W3110 cells keep  
202 moving with 180°-reversals to escape from a stuck. Scale bar, 50  $\mu\text{m}$ .

203 Supplementary Video 13  
204 Swimming motility of ATCC10798 (*left*) and W3110 (*right*) in the presence of 15 %  
205 ficoll. Scale bar, 20  $\mu\text{m}$ .

206

207



208 **Supplementary References**

- 209 1 Taute, K. M., Gude, S., Tans, S. J. & Shimizu, T. S. High-throughput 3D tracking  
210 of bacteria on a standard phase contrast microscope. *Nature communications* **6**,  
211 8776, doi:10.1038/ncomms9776 (2015).
- 212 2 Kamiya, R., Hotani, H. & Asakura, S. Polymorphic transition in bacterial flagella.  
213 *Symposia of the Society for Experimental Biology* **35**, 53-76 (1982).
- 214 3 Maki-Yonekura, S., Yonekura, K. & Namba, K. Conformational change of  
215 flagellin for polymorphic supercoiling of the flagellar filament. *Nature structural*  
216 *& molecular biology* **17**, 417-422, doi:10.1038/nsmb.1774 (2010).
- 217 4 Yonekura, K., Maki-Yonekura, S. & Namba, K. Complete atomic model of the  
218 bacterial flagellar filament by electron cryomicroscopy. *Nature* **424**, 643-650,  
219 doi:10.1038/nature01830 (2003).
- 220 5 Parkinson, J. S. Complementation analysis and deletion mapping of *Escherichia*  
221 *coli* mutants defective in chemotaxis. *Journal of bacteriology* **135**, 45-53 (1978).
- 222 6 Datsenko, K. A. & Wanner, B. L. One-step inactivation of chromosomal genes in  
223 *Escherichia coli* K-12 using PCR products. *Proceedings of the National Academy*  
224 *of Sciences of the United States of America* **97**, 6640-6645,  
225 doi:10.1073/pnas.120163297 (2000).
- 226 7 Sowa, Y. *et al.* Direct observation of steps in rotation of the bacterial flagellar  
227 motor. *Nature* **437**, 916-919, doi:10.1038/nature04003 (2005).

228

229

230
